# Supplementary material
Source: PubMed Central journal article supplement (PMC5784826)
Supplement: NIHMS935191-supplement-supplement_1.pdf [file NIHMS935191-supplement-supplement_1.pdf]

## ONLINE REPOSITORY

### STATISTICAL ANALYSES

#### Data summarization

Categorical data were summarized by frequencies and percentages, and continuous scaled data were summarized by the mean and SD of the distribution.

#### Relationship of SNOT-22 to tissue eosinophilia

Spearman rank correlation analyses were conducted to examine the relationship of the preoperative SNOT-22 composite score with “average” and “peak” tissue eosinophilia count. Spearman rank correlation analyses were also conducted to examine whether the individual components of the preoperative SNOT-22 were related to “average” and “peak” eosinophilia count. With regard to hypothesis testing, all tests of association were designed to test the null hypothesis that the true underlying correlation coefficient is equal to zero, with the alternative hypothesis that the true underlying correlation coefficient is not equal to zero. A  $P \leq .05$  decision rule was established *a priori* as null hypothesis rejection criterion.

#### Relationship of medical history, sinus CT, and blood biomarkers with tissue eosinophilia

Comparisons of “average” and “peak” tissue eosinophilia count in relationship to asthma status, AR status, smoking status, and AERD status were conducted via the 2-sample Welch test. The 2-sample Welch test is similar to the 2-sample Student *t* test, but unlike the 2-sample Student *t* test, the 2-sample Welch test does not require the underlying variances of the 2 study populations to be equal. With regard to hypothesis testing, all the 2-sample Welch tests were designed to test the null hypothesis that the underlying means of the tissue eosinophilia distributions (eg, comparison of average tissue eosinophilia) are equal, with the

alternative hypothesis that the underlying means of the tissue eosinophilia distributions are not equal. A  $P \leq .05$  decision rule was established *a priori* as the null hypothesis rejection criterion.

Blood biomarker (absolute eosinophilia count and total IgE) and the Lund-MacKay score relationships with tissue eosinophilia were examined by comparing the geometric means of the blood biomarker distributions between patients who were grouped according to the tertiles of the “tissue average eosinophilia count” empirical distribution. In the framework of ANOVA, an *F* test was used to test the null hypothesis that the geometric means of the biomarker distributions (eg, absolute eosinophilia count distributions) are irrespective of “tissue average eosinophilia” tertile, with the alternative that the geometric means of the biomarker distributions are “tissue average eosinophilia” tertile dependent. A  $P \leq .05$  null hypothesis rejection criterion was established *a priori* as the null hypothesis rejection criterion for the *F* test.

#### Postoperative medical outcome

Postoperative improvement in SNOT-22 scores was analyzed as a function of eosinophil content of NP tissue. Spearman rank correlation analyses were conducted to examine the relationships of the preoperative to postoperative change in the SNOT-22 score to “tissue average” and “tissue peak” eosinophilia. A  $P \leq .05$  null hypothesis rejection criterion was established *a priori* as the null hypothesis rejection criterion for rejecting the null hypothesis of zero bivariate correlation, versus the alternative hypothesis of nonzero bivariate correlation.

#### Statistical software

The Spotfire Splus version 8.2 statistical package (TIBCO Inc, Palo Alto, Calif) was used to conduct the aforementioned set of statistical analyses.

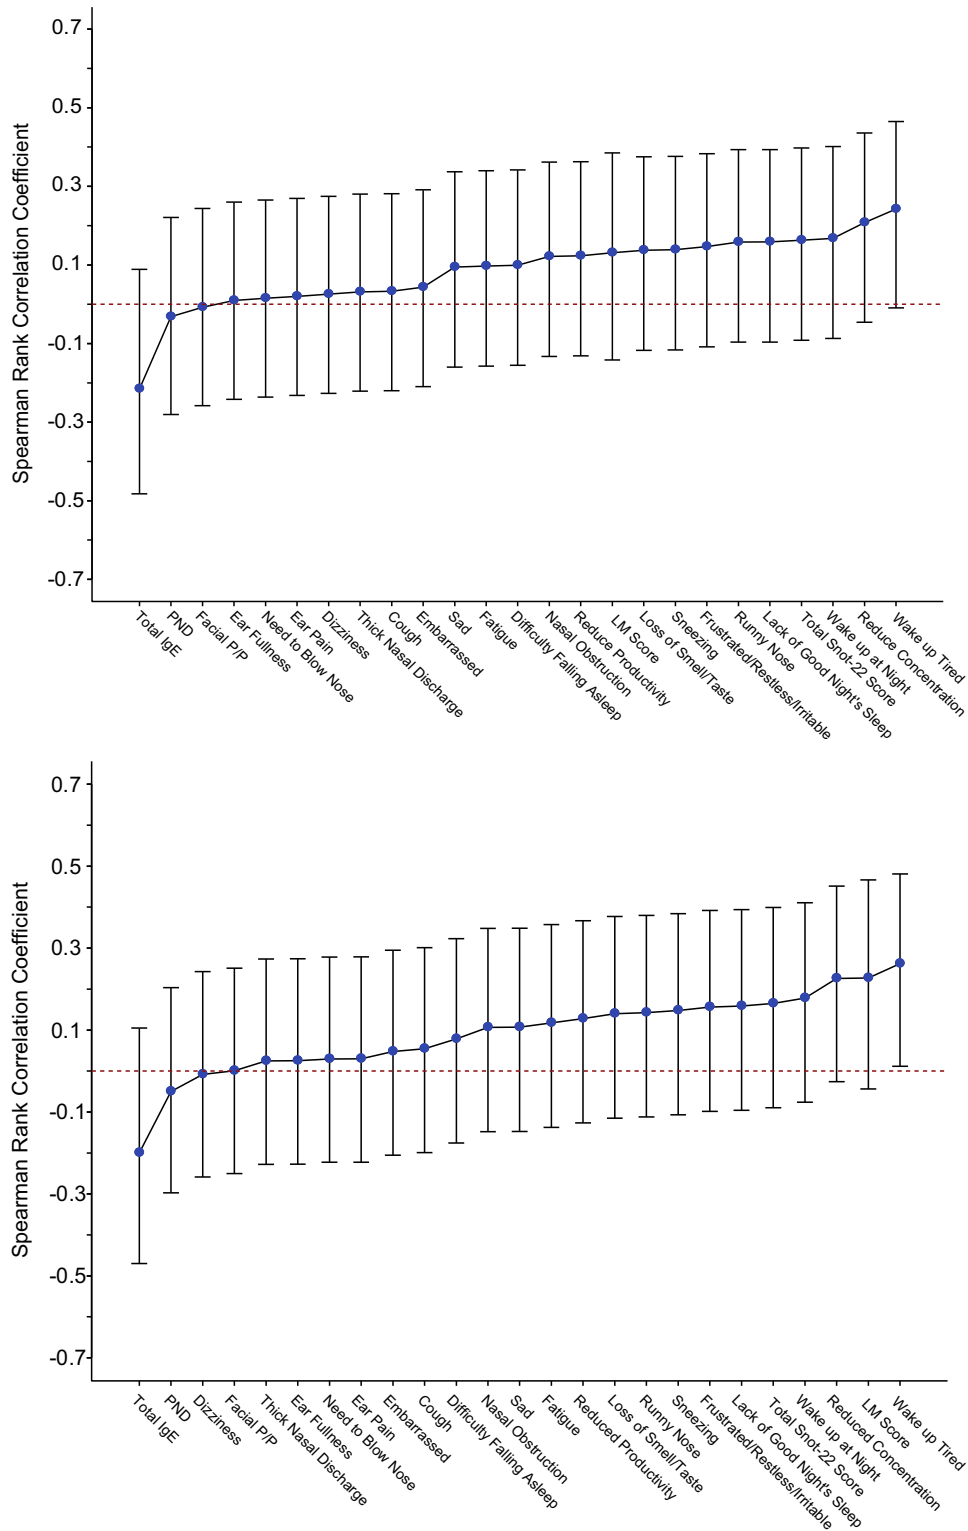

**FIGURE E1.** Correlation of individual components of the SNOT-22, total IgE, and LMS with average (A) and peak (B) tissue eosinophilia. Blue circles identify the estimate for the Spearman rank correlation coefficient, and vertical lines identify the 95% CI. LMS, Lund-Mackay score; P/P, pain and pressure; PND, post nasal drip.

**TABLE E1.** Spearman correlations coefficients ( $r_s$ ) for correlation of individual components of the SNOT-22, and IgE and LMS with average and peak tissue eosinophilia

| Average tissue eosinophilia   |       |               |         | Peak tissue eosinophilia      |       |               |         |
|-------------------------------|-------|---------------|---------|-------------------------------|-------|---------------|---------|
| Correlate                     | $r_s$ | 95% CI        | P value | Correlate                     | $r_s$ | 95% CI        | P value |
| Total IgE                     | -0.22 | -0.48 to 0.09 | .151    | Total IgE                     | -0.20 | -0.47 to 0.10 | .183    |
| PND                           | -0.03 | -0.28 to 0.22 | .801    | PND                           | -0.05 | -0.30 to 0.20 | .693    |
| Facial P/P                    | -0.01 | -0.26 to 0.24 | .952    | Dizziness                     | -0.01 | -0.26 to 0.24 | .947    |
| Ear fullness                  | 0.01  | -0.24 to 0.26 | .939    | Facial P/P                    | 0.00  | -0.25 to 0.25 | .997    |
| Need to blow                  | 0.02  | -0.24 to 0.27 | .903    | Thick nasal discharge         | 0.02  | -0.23 to 0.27 | .846    |
| Ear pain                      | 0.02  | -0.23 to 0.27 | .875    | Ear fullness                  | 0.03  | -0.23 to 0.27 | .843    |
| Dizziness                     | 0.03  | -0.23 to 0.27 | .840    | Need to blow nose             | 0.03  | -0.22 to 0.28 | .815    |
| Thick nasal discharge         | 0.03  | -0.22 to 0.28 | .803    | Ear pain                      | 0.03  | -0.22 to 0.28 | .813    |
| Cough                         | 0.03  | -0.22 to 0.28 | .795    | Embarrassed                   | 0.05  | -0.21 to 0.30 | .706    |
| Embarrassed                   | 0.04  | -0.21 to 0.29 | .731    | Cough                         | 0.05  | -0.20 to 0.30 | .667    |
| Sad                           | 0.09  | -0.16 to 0.34 | .454    | Difficulty falling asleep     | 0.08  | -0.18 to 0.32 | .535    |
| Fatigue                       | 0.10  | -0.16 to 0.34 | .441    | Nasal obstruction             | 0.11  | -0.15 to 0.35 | .397    |
| Difficulty falling asleep     | 0.10  | -0.16 to 0.34 | .431    | Sad                           | 0.11  | -0.15 to 0.35 | .395    |
| Nasal obstruction             | 0.12  | -0.13 to 0.36 | .334    | Fatigue                       | 0.12  | -0.14 to 0.36 | .352    |
| Reduced productivity          | 0.12  | -0.13 to 0.36 | .328    | Reduced productivity          | 0.13  | -0.13 to 0.37 | .309    |
| LMS                           | 0.13  | -0.14 to 0.39 | .332    | Loss smell/taste              | 0.14  | -0.12 to 0.38 | .267    |
| Loss smell/taste              | 0.14  | -0.12 to 0.38 | .275    | Runny nose                    | 0.14  | -0.11 to 0.38 | .257    |
| Sneezing                      | 0.14  | -0.12 to 0.38 | .271    | Sneezing                      | 0.15  | -0.11 to 0.38 | .240    |
| Frustrated/restless/irritable | 0.15  | -0.11 to 0.38 | .244    | Frustrated/restless/irritable | 0.16  | -0.10 to 0.39 | .214    |
| Runny nose                    | 0.16  | -0.10 to 0.39 | .208    | Lack of good night's sleep    | 0.16  | -0.10 to 0.39 | .207    |
| Lack of good night's sleep    | 0.16  | -0.10 to 0.39 | .207    | Total SNOT-22 score           | 0.17  | -0.09 to 0.40 | .189    |
| Total SNOT-22 score           | 0.16  | -0.09 to 0.40 | .195    | Wake up at night              | 0.18  | -0.08 to 0.41 | .156    |
| Wake up at night              | 0.17  | -0.09 to 0.40 | .183    | Reduced concentration         | 0.23  | -0.03 to 0.45 | .070    |
| Reduced concentration         | 0.21  | -0.05 to 0.44 | .097    | LMS                           | 0.23  | -0.04 to 0.47 | .090    |
| Wake up tired                 | 0.24  | -0.01 to 0.46 | .052    | Wake up tired                 | 0.26  | 0.01 to 0.48  | .035    |

LMS, Lund-Mackay score; P/P, pain and pressure; PND, post nasal drip.
